# Supplementary material
Source: Research Square preprint supplement (doi:10.21203/rs.3.rs-9145216/v1)
Supplement: Supplementary file 1 [file 656985f087ba14d3865743ac.docx]

**Table S1 Strains used in this study**

| **Strains** | **Characteristics** | **Source** |
| --- | --- | --- |
| NTUH-K2044 | Hypervirulent *Klebsiella pneumoniae*, hvKP | National Taiwan University College of Medicine |
| K2044-Δ*envZ* | Knockout the *envZ* gene | This work |
| EKP19 | ESBLs-KP | Sputum specimen |
| EKP108 | ESBLs-KP | Urine specimen |
| K2044-W90 | Induced to 90 generations under sugar-free conditions | This work |
| EKP19-W90 |
| EKP108-W90 |
| K2044-0.5frut-90G | Induced to 90 generations under 0.5% fructose conditions | This work |
| EKP19-0.5frut-90G |
| EKP108-0.5frut-90G |
| K2044-8frut-90G | Induced to 90 generations under 8% fructose conditions | This work |
| EKP19-8frut-90G |
| EKP108-8frut-90G |
| K2044-0.5FOS-90G | Induced to 90 generations under 0.5% FOS conditions | This work |
| EKP19-0.5FOS-90G |
| EKP108-0.5FOS-90G |
| K2044-8FOS-90G | Induced to 90 generations under 8% FOS conditions | This work |
| EKP19-8FOS-90G |
| EKP108-8FOS-90G |

**Table S2 Antimicrobial susceptibility breakpoints**

| Antimicrobial | Breakpoints (μg/mL) | | |
| --- | --- | --- | --- |
| S (susceptible) | I (intermediate) | R (resistant) |
| Gentamicin | ≤2 | 4 | ≥8 |
| Ceftazidime | ≤4 | 8 | ≥16 |
| Levofloxacin | ≤0.5 | 1 | ≥2 |
| Meropenem | ≤1 | 2 | ≥4 |
| Tigecycline* | ≤2 | 4 | ≥8 |

*: Tigecycline used the FDA breakpoint.

**Table S3 Primers used in this study.**

| **Primers** | **Sequence** |  |
| --- | --- | --- |
| K2044-Δ*envZ*-F | 5’-GTGTCTAAAGCGGGTCACGC-3’ | Upstream |
| K2044-Δ*envZ*-R | 5’-CTGGAGATTGGCTCCAGCGAAC-3’ |
| K2044-Δ*envZ*-F | 5’-CACGCGTTTCATGCCTTAGAAC-3’ | Downstream |
| K2044-Δ*envZ*-R | 5’-GAGAATACGCACTGACTATTGCAGT-3’ |
| *envZ*-Gm-F | 5’-GTTCGCTGGAGCCAATCTCCAGTTGTGACAATTTACCGAACAACTC-3’ |  |
| *envZ*-Gm-R | 5’-GTTCTAAGGCATGAAACGCGTGAGAAATGCCTCGACTTCGC-3’ |


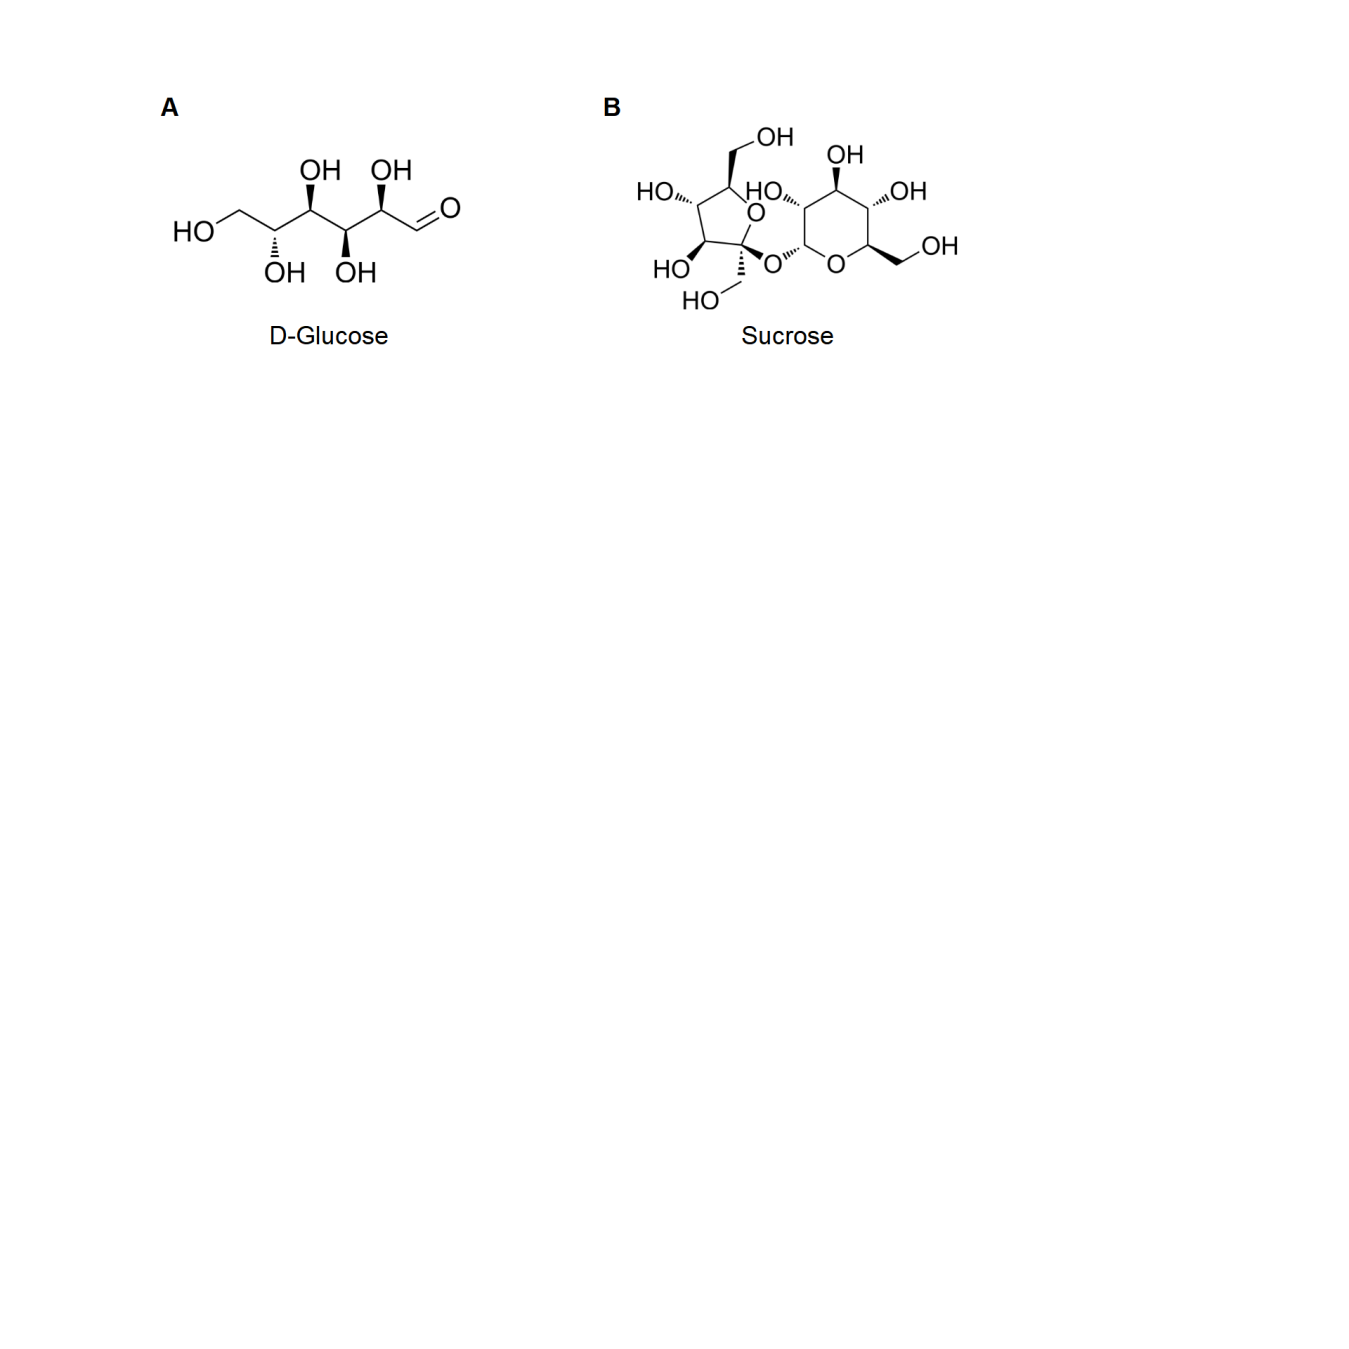


**Figure S1.** Chemical structural formula for D-glucose **(A)** and sucrose **(B).**


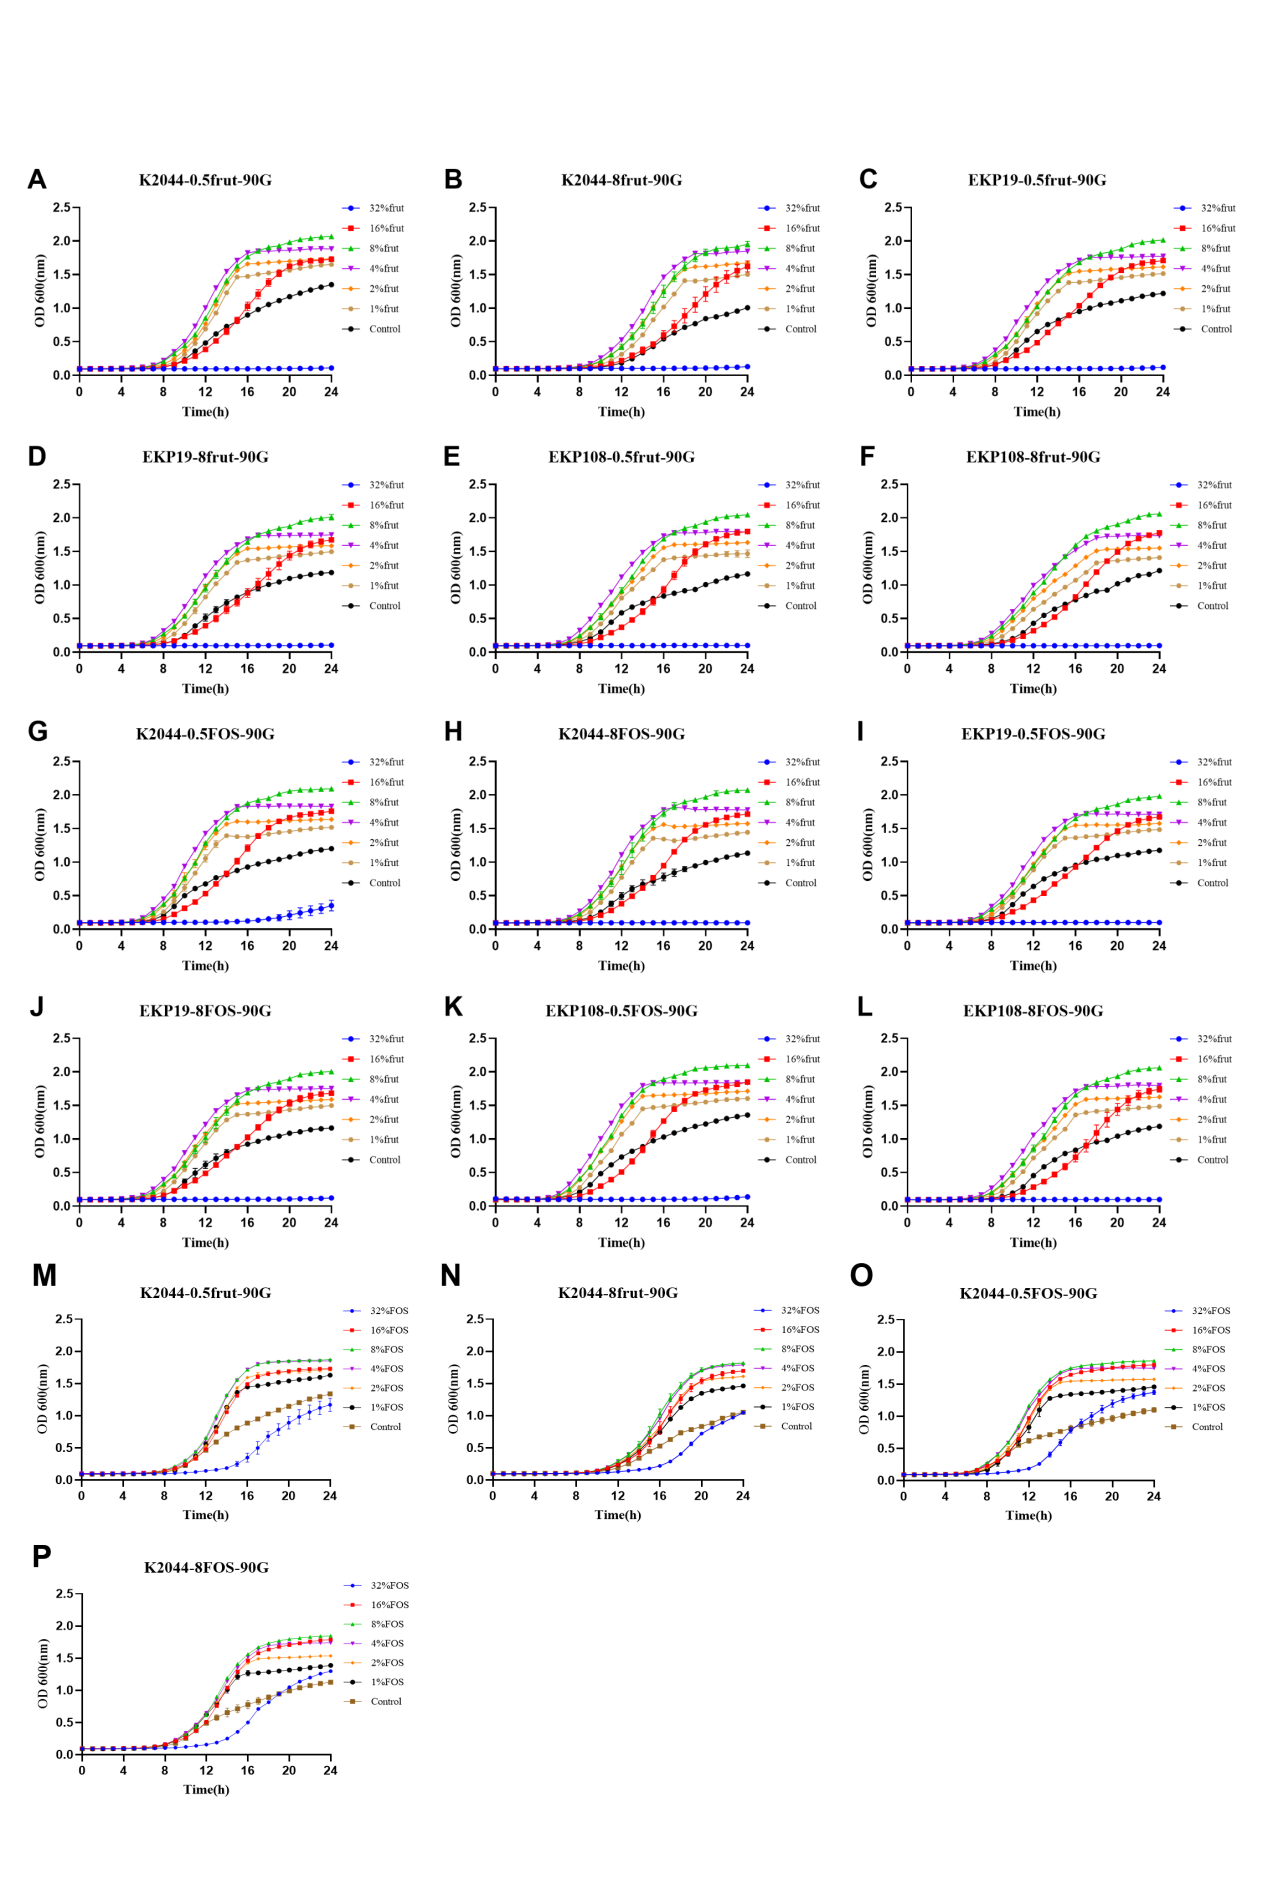


**Figure S2.** Growth curves of fructose or FOS-induced K2044 and two clinical isolates at different initial fructose concentrations **(A-L).** Growth curves of fructose or FOS-induced K2044 at different initial FOS concentrations **(M-P)**. MRS without sugar as control.


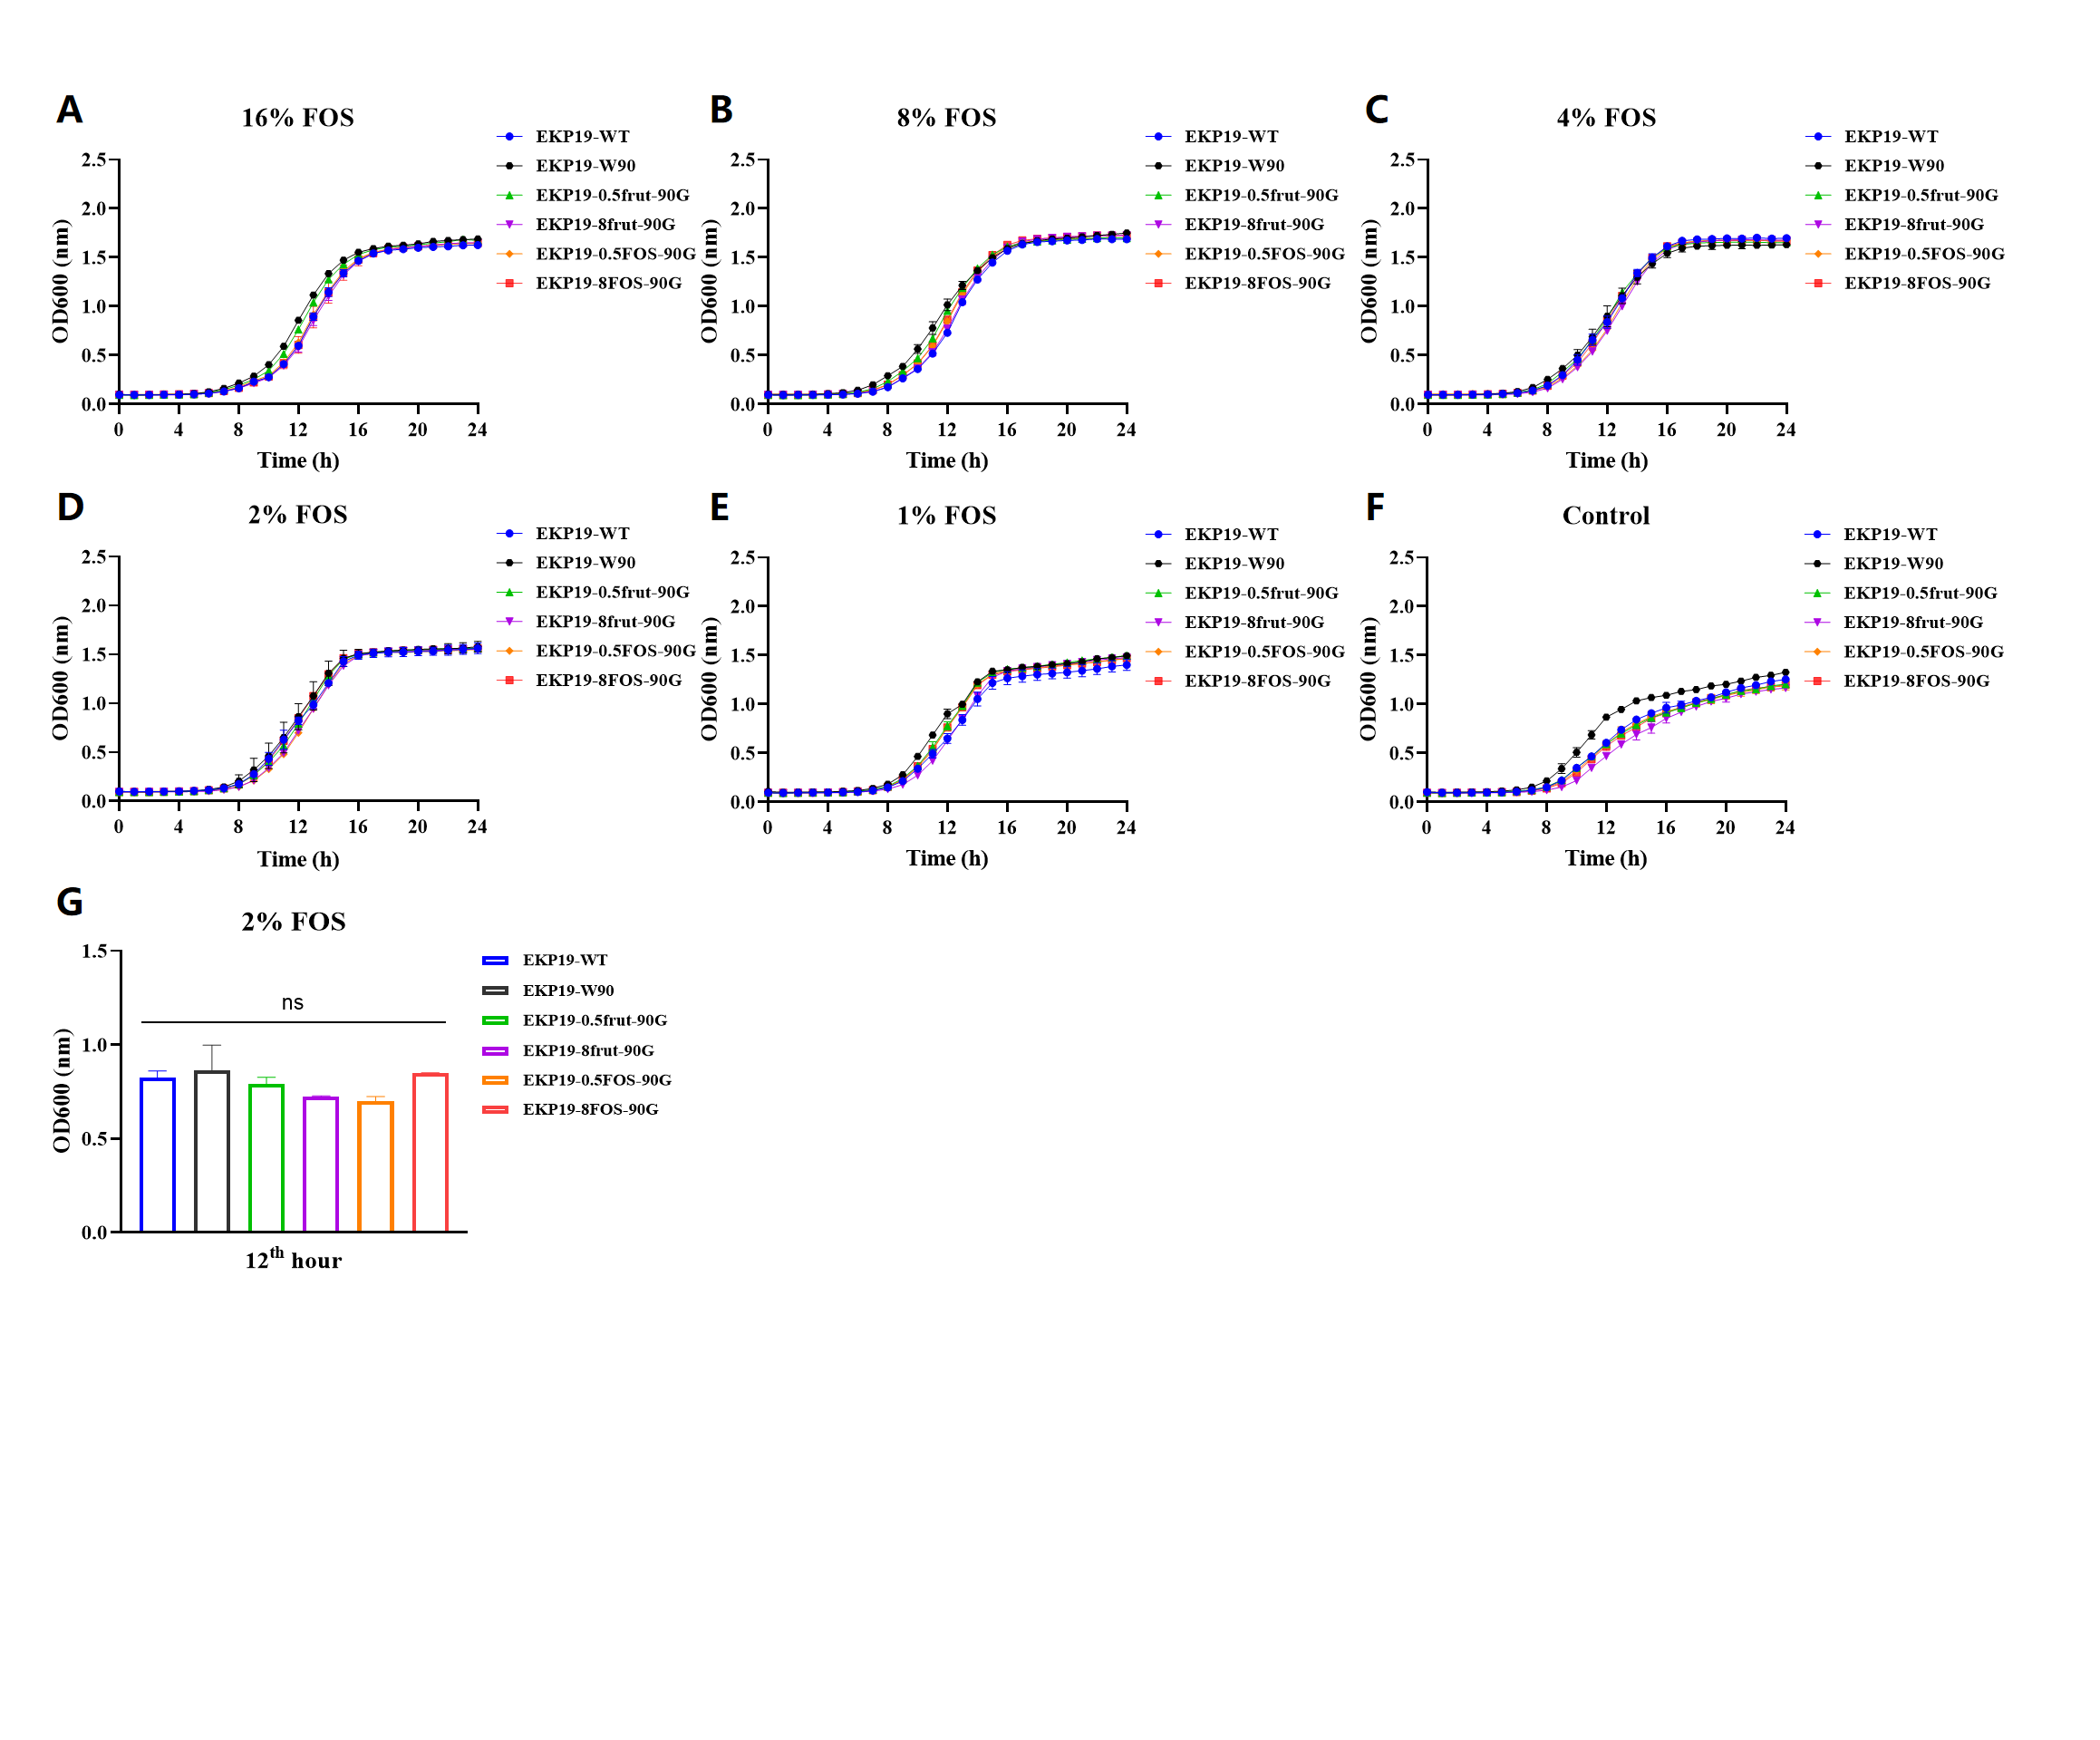


**Figure S3.** Growth curves of EKP19 and its derivatives (EKP19-WT, EKP19-W90, EKP19-0.5frut-90G, EKP19-8frut-90G, EKP19-0.5FOS-90G, EKP19-8FOS-90G) at the each concentration of FOS. MRS medium supplemented with 16% FOS **(A)**, 8% FOS **(B)**, 4% FOS **(C)**, 2% FOS **(D)**, 1% FOS **(E)**. MRS without sugar as control **(F).** Comparison of OD600 values of EKP19 series strains at logarithmic period (12th hour), n=3, ns: no significance **(G)**.


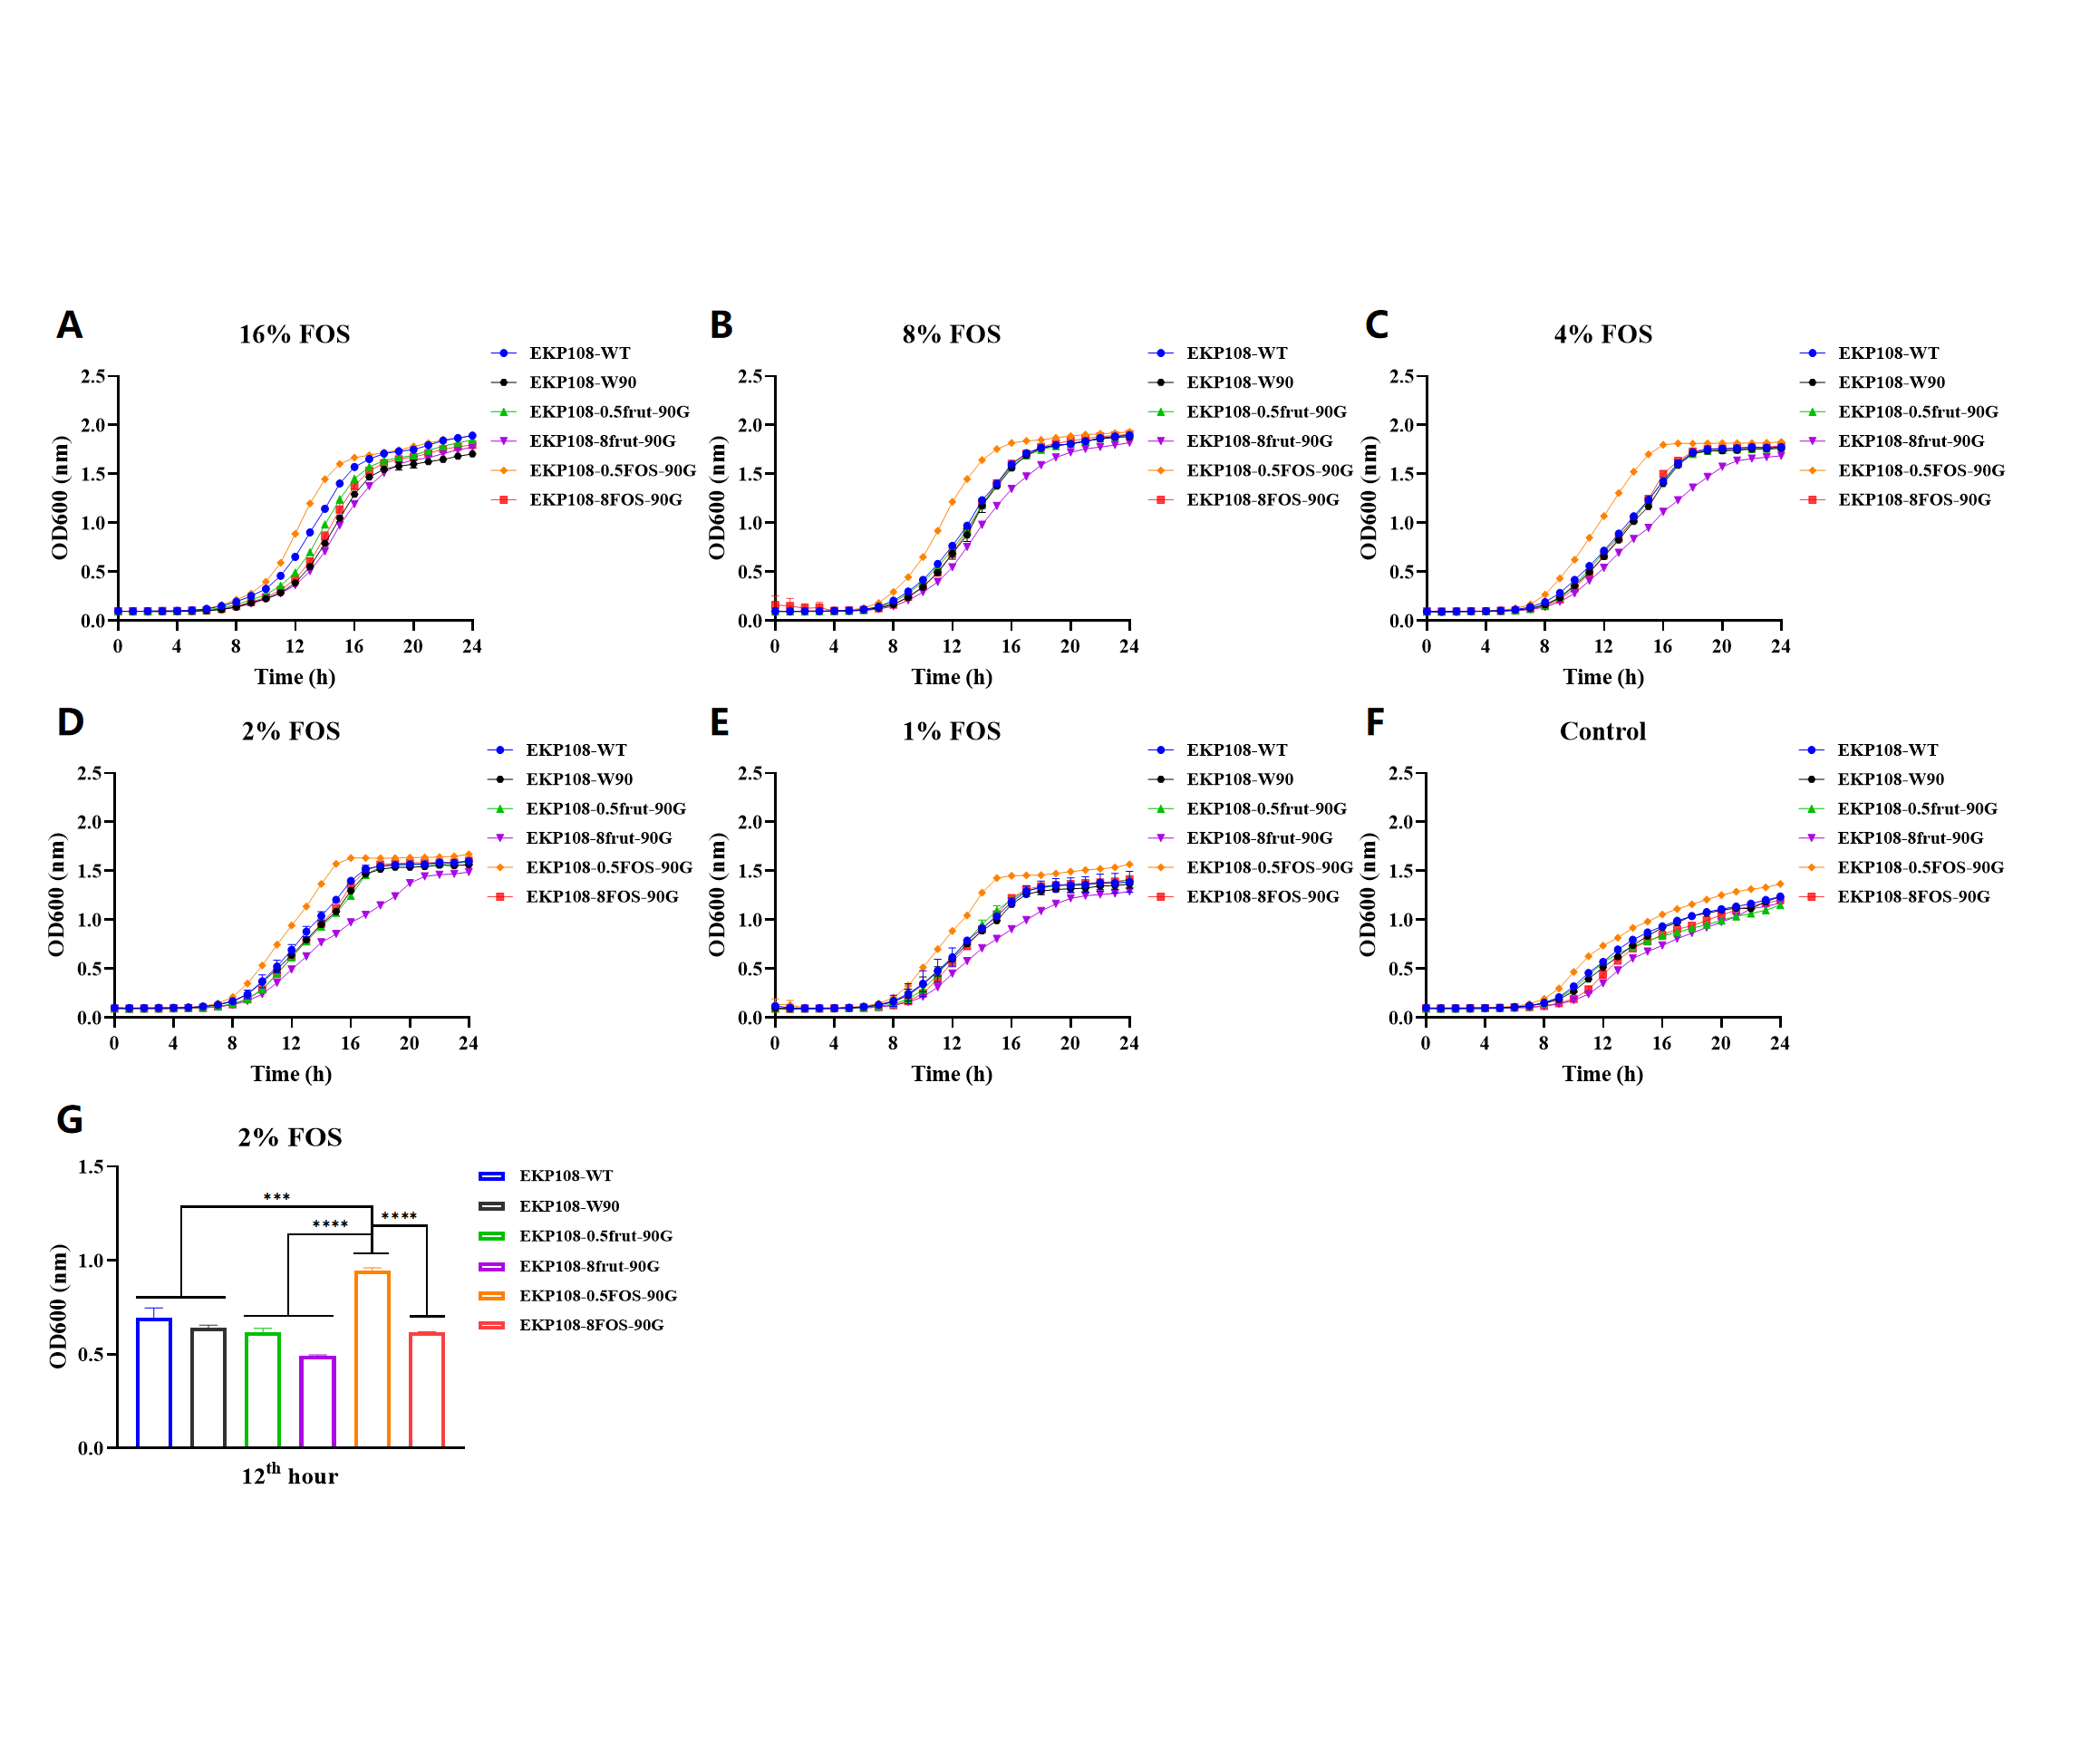


**Figure S4.** Growth curves of EKP108 and its derivatives (EKP108-WT, EKP108-W90, EKP108-0.5frut-90G, EKP108-8frut-90G, EKP108-0.5FOS-90G, EKP108-8FOS-90G) at the each concentration of FOS. MRS medium supplemented with 16% FOS **(A)**, 8% FOS **(B)**, 4% FOS **(C)**, 2% FOS **(D)**, 1% FOS **(E)**. MRS without sugar as control **(F)**. Comparison of OD600 values of EKP108 series strains at logarithmic period (12th hour), n=3, ****P*＜0.001, *****P*＜0.0001 **(G)**.


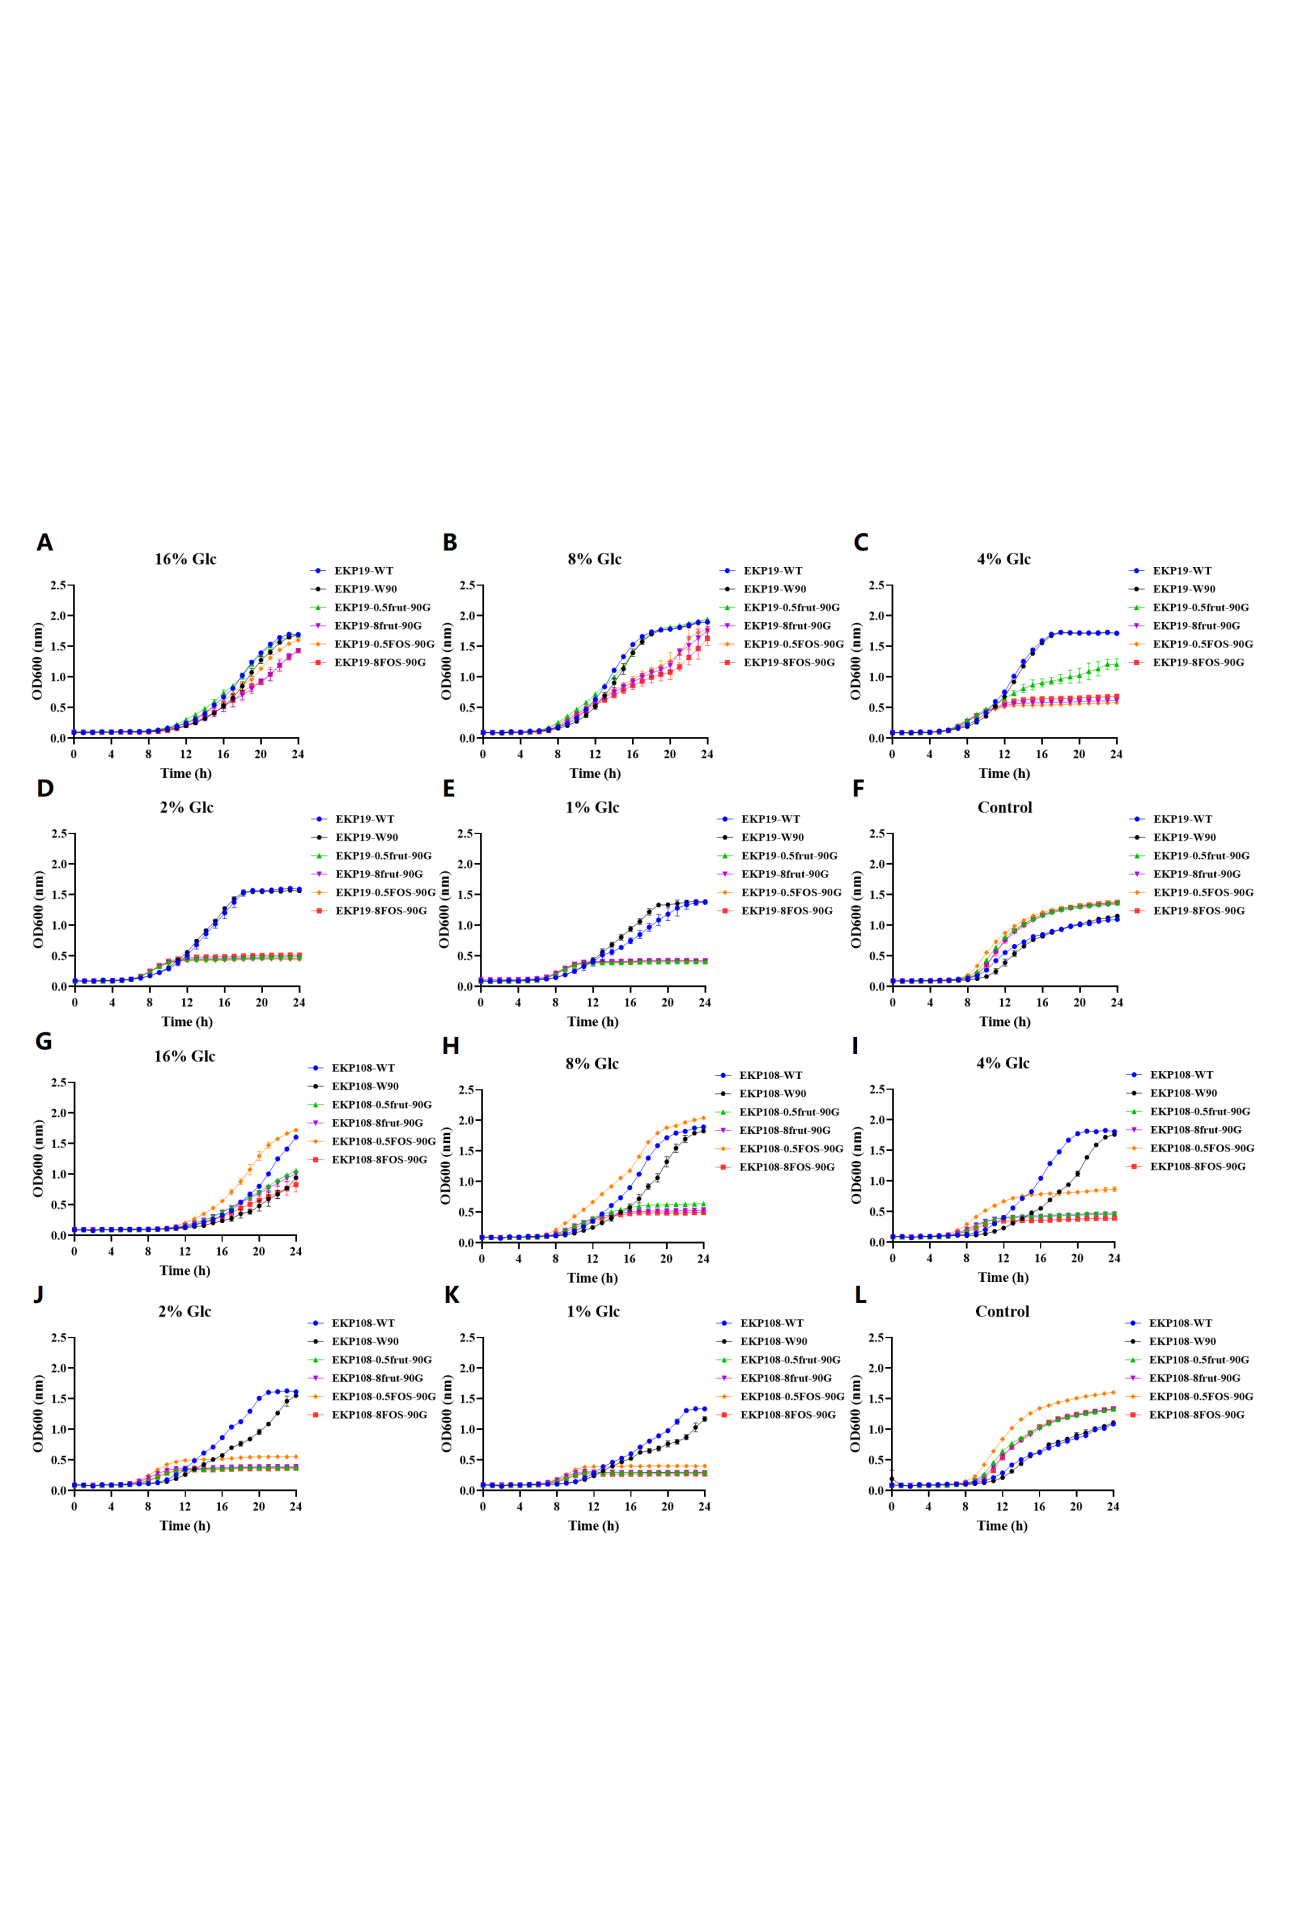


**Figure S5.** Growth curves of EKP19, EKP108 and their derivatives at the same initial glucose concentration. Growth curves of EKP19 and its derivatives (EKP19-WT, EKP19-W90, EKP19-0.5frut-90G, EKP19-8frut-90G, EKP19-0.5FOS-90G, EKP19-8FOS-90G) at the same initial glucose concentration **(A-F)**. Growth curves of EKP108 and its derivatives (EKP108-WT, EKP108-W90, EKP108-0.5frut-90G, EKP108-8frut-90G, EKP108-0.5FOS-90G, EKP108-8FOS-90G) at the same initialglucose concentration **(G-L).**


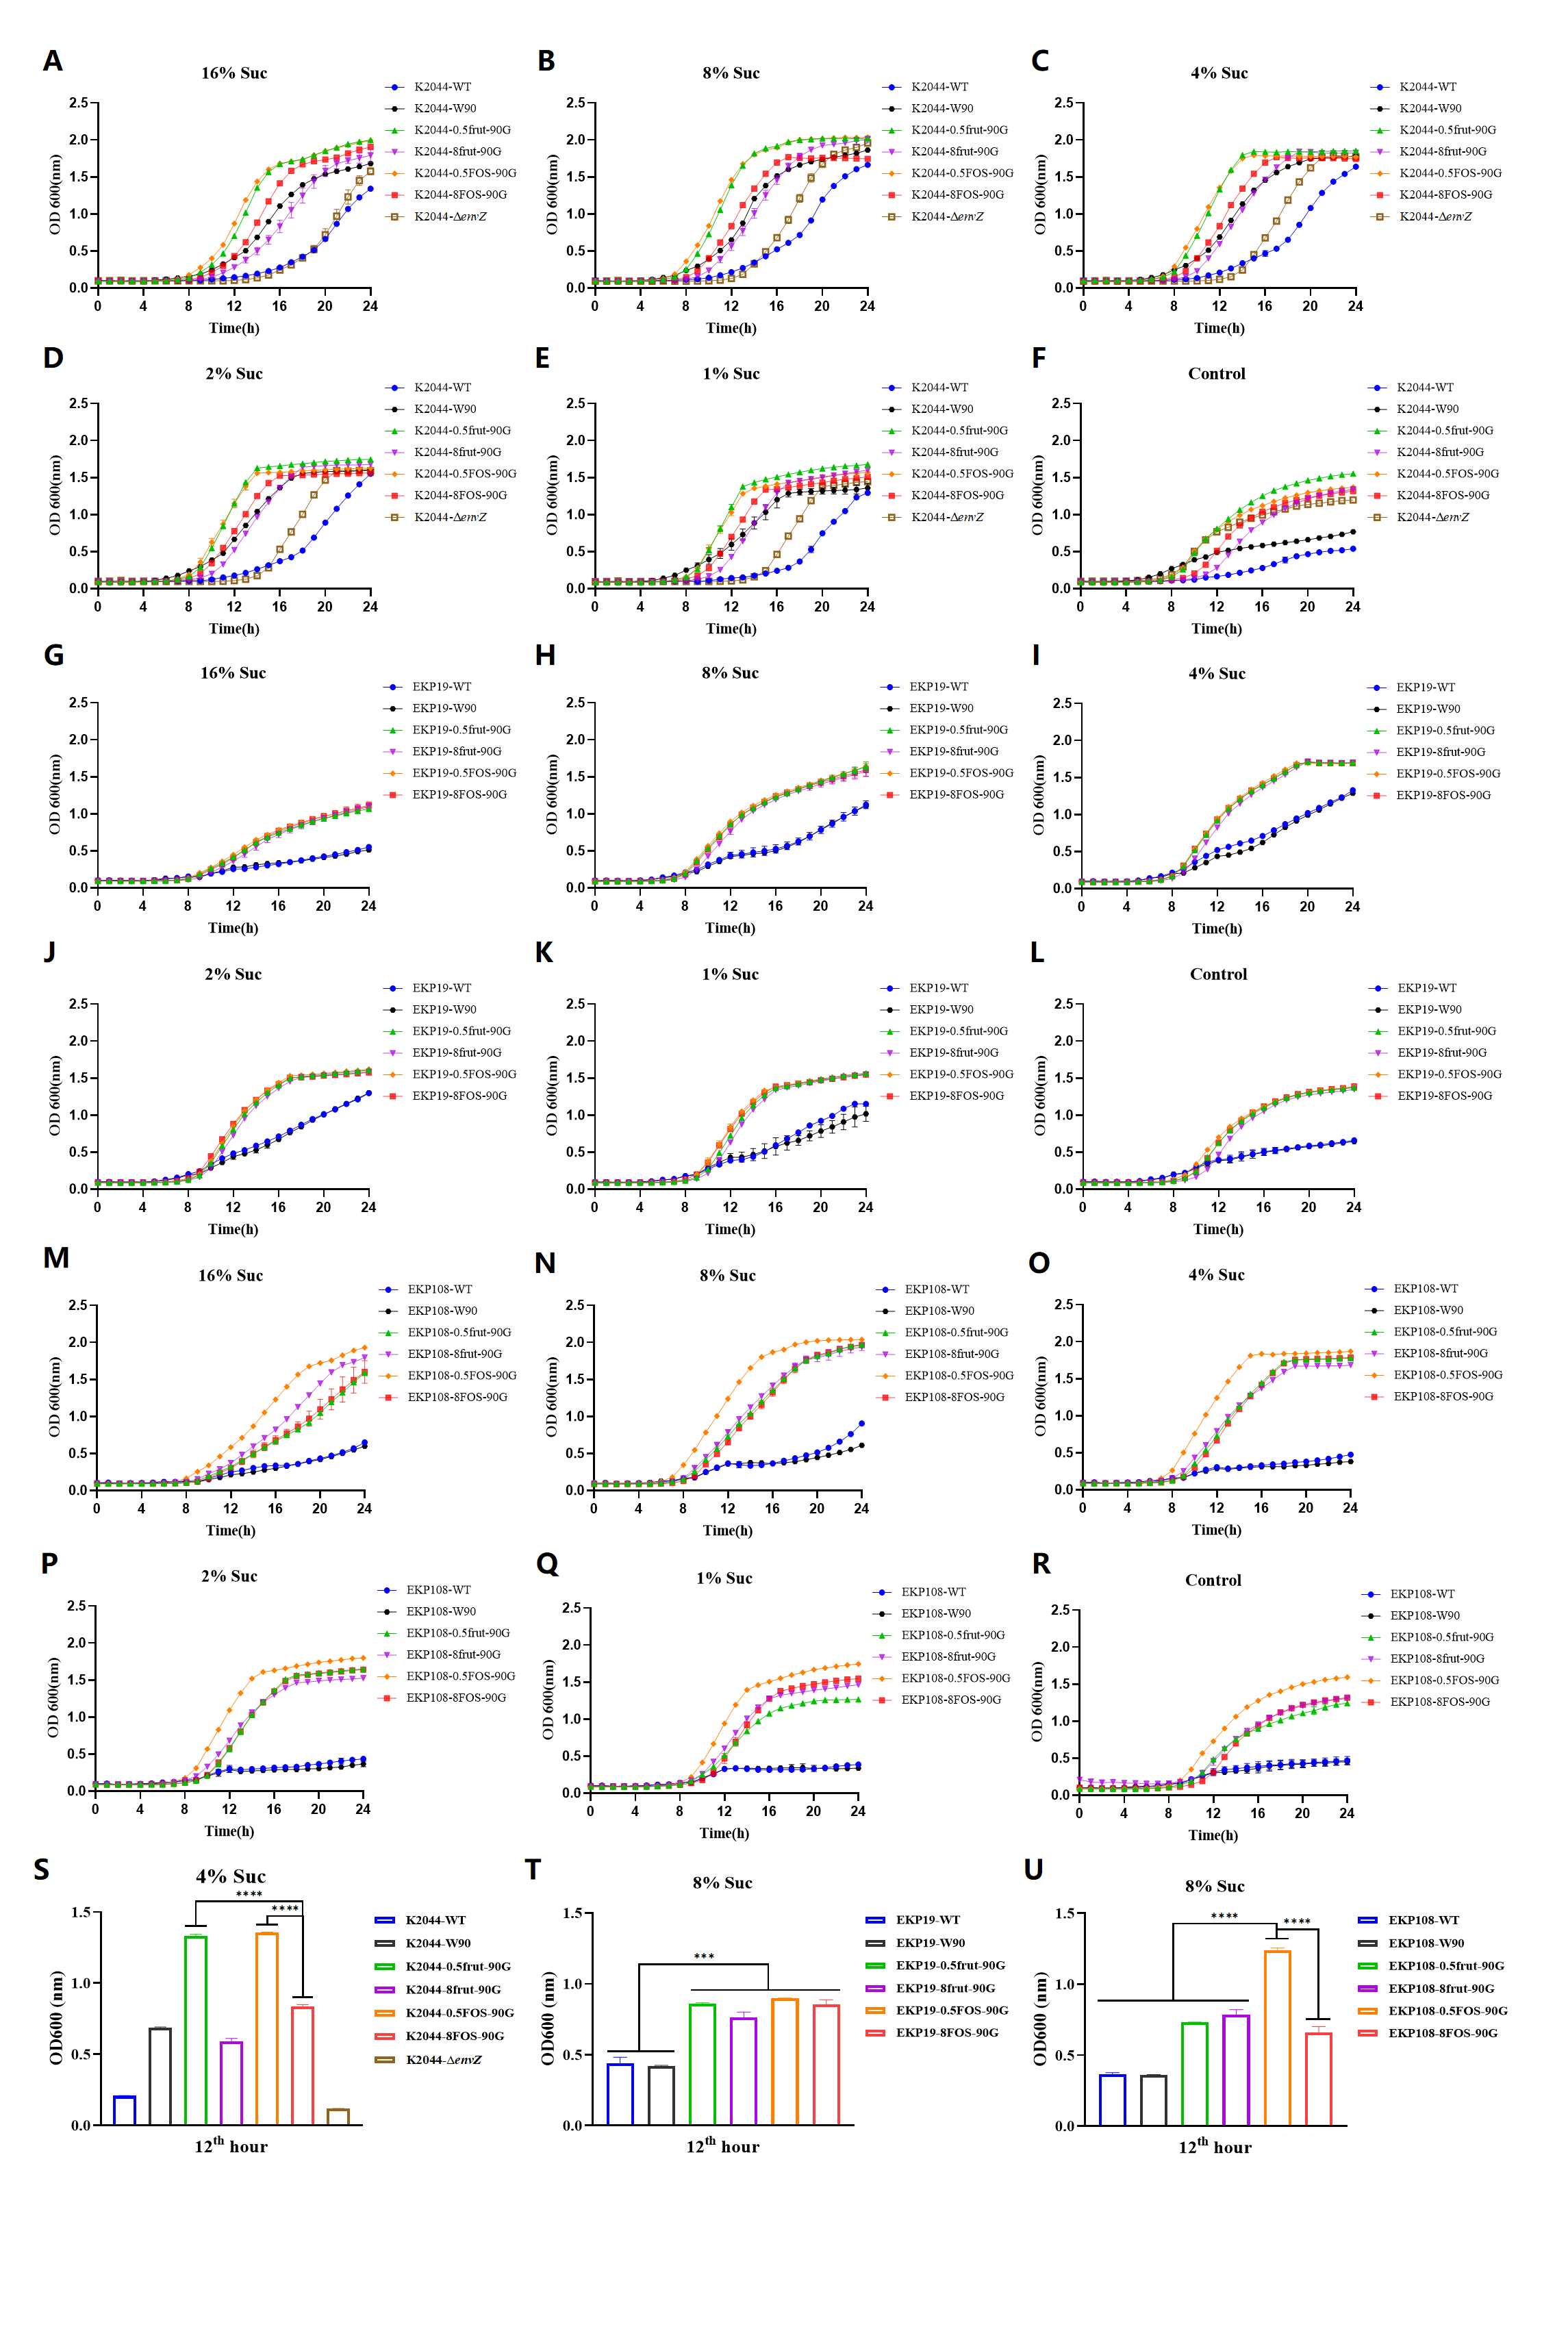


**Figure S6.** Growth curves of K2044 and its derivatives (K2044-WT, K2044-W90, K2044-0.5frut-90G, K2044-8frut-90G, K2044-0.5FOS-90G, K2044-8FOS-90G, K2044-∆*envZ*) at the same initial sucrose concentration **(A-F)**. Growth curves of EKP19 and its derivatives (EKP19-WT, EKP19-W90, EKP19-0.5frut-90G, EKP19-8frut-90G, EKP19-0.5FOS-90G, EKP19-8FOS-90G) **(G-L)**. Growth curves of EKP108 and its derivatives (EKP108-WT, EKP108-W90, EKP108-0.5frut-90G, EKP108-8frut-90G, EKP108-0.5FOS-90G, EKP108-8FOS-90G) **(M-R).** MRS without sugar as control. Comparison of OD600 values of K2044 **(S)**, EKP19 **(T)**, EKP108 **(U)** series strains at logarithmic period (12th hour), n=3, **P*＜0.05, ***P*＜0.01, ****P*＜0.001, *****P*＜0.0001.
